# Supplementary material
Source: MDPI journal article supplement (https://www.mdpi.com/2075-4442/11/3/144)
Supplement: s1 [file s1]

## SUPPLEMENTARY INFORMATION

The chemical formula and molecular structure of EE and TE are shown below.

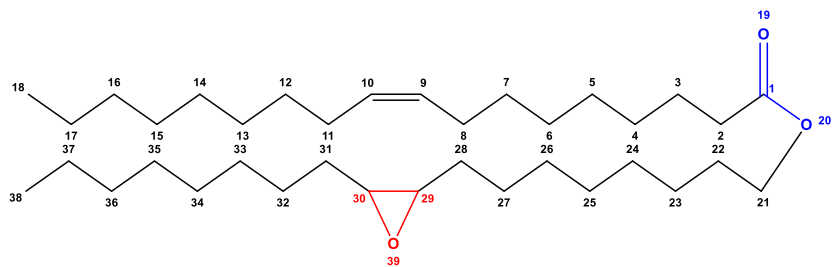

Chemical Formula:  $C_{36}H_{68}O_3$

### **Epoxidised Ester (EE)**

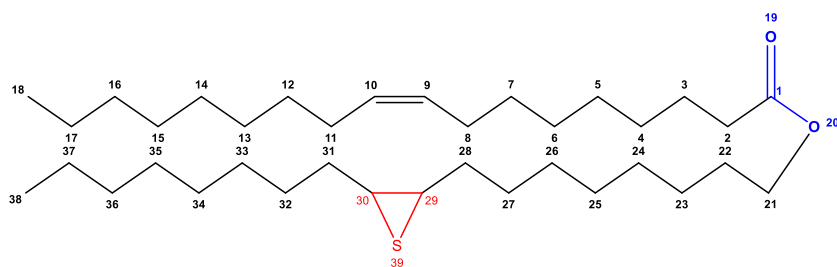

Chemical Formula:  $C_{36}H_{68}O_2S$

### **Thirane Ester (TE)**
