# Supplementary material
Source: MDPI journal article supplement (https://www.mdpi.com/2075-4442/11/3/144)
Supplement: s1 [file s1]

Archive with 1 entries (1 files):
- lubricants-2232352-SI.pdf
